# Supplementary material
Source: Springer Nature journal article supplement (https://www.springermedizin.de/resource/supplementary/12913_2013_2737_MOESM2_ESM.pdf/9531174)
Supplement: MOESM2 [file 9531174]

Additional file 2: Characteristics of prostate cancer patients in total, and by RP surgery status

|                                      | All prostate<br>(n=9096) (%) | RP - yes<br>(n=2411) (%) | RP - no<br>(n=6685) (%) | X <sup>2</sup> Test | All RPs <sup>1</sup><br>(n=2411) (%) | Public hosp<br>(n=1610) (%) | Private hosp<br>(n=795) (%) | X <sup>2</sup> Test |
|--------------------------------------|------------------------------|--------------------------|-------------------------|---------------------|--------------------------------------|-----------------------------|-----------------------------|---------------------|
| <b>Age at diagnosis</b>              |                              |                          |                         |                     |                                      |                             |                             |                     |
| <55                                  | 1085 (11.9)                  | 513 (21.3)               | 572(8.6)                | 687.4,<br>p <0.001  | 513 (21.3)                           | 370 (23.0)                  | 143 (18.0)                  | 13.3,<br>p =0.004   |
| 55-59                                | 1865 (20.5)                  | 723 (30.0)               | 1142 (17.1)             |                     | 723 (30.0)                           | 481 (29.9)                  | 240 (30.2)                  |                     |
| 60-64                                | 2727 (30.0)                  | 718 (29.8)               | 2009 (30.1)             |                     | 718 (29.8)                           | 481 (29.9)                  | 235 (29.6)                  |                     |
| 65-69                                | 3419 (37.6)                  | 457 (18.9)               | 2962 (44.3)             |                     | 457 (18.9)                           | 278 (17.3)                  | 177 (22.3)                  |                     |
| <b>Marital status</b>                |                              |                          |                         |                     |                                      |                             |                             |                     |
| Married                              | 6706 (73.7)                  | 2006 (83.2)              | 4700 (70.3)             | 154.0,<br>p<0.001   | 2006 (82.2)                          | 1334 (82.9)                 | 667 (83.9)                  | 1.67,<br>p=0.795    |
| Other                                | 2312 (25.4)                  | 397 (16.5)               | 1915(28.6)              |                     | 397 (16.5)                           | 272 (16.9)                  | 124 (15.6)                  |                     |
| Unknown                              | 78 (0.9)                     | 8 (0.3)                  | 70 (1.0)                |                     | 8 (0.3)                              | 4 (0.2)                     | 4 (0.5)                     |                     |
| <b>Deprivation index<sup>2</sup></b> |                              |                          |                         |                     |                                      |                             |                             |                     |
| 1 (least )                           | 2051 (22.5)                  | 633 (26.3)               | 1418 (21.2)             | 42.0<br>p< 0.001    | 633 (26.3)                           | 417 (25.9)                  | 216 (27.2)                  | 28.7,<br>p = 0.001  |
| 2                                    | 1203 (13.2)                  | 319 (13.2)               | 884 (13.20)             |                     | 319 (13.2)                           | 203 (12.6)                  | 115 (14.5)                  |                     |
| 3                                    | 1190 (13.1)                  | 320 (13.3)               | 870 (13.0)              |                     | 320 (13.3)                           | 207 (12.9)                  | 111 (14.0)                  |                     |
| 4                                    | 1483 (16.3)                  | 408 (16.9)               | 1075 (16.1)             |                     | 408 (16.9)                           | 257 (16.0)                  | 149(18.7)                   |                     |
| 5 (most)                             | 2227 (24.5)                  | 498 (20.7)               | 1729 (25.9)             |                     | 498 (20.7)                           | 377 (23.4)                  | 121 (15.2)                  |                     |
| Unknown                              | 942 (10.4)                   | 233 (9.7)                | 709 (10.6)              |                     | 233 (9.7)                            | 149 (9.2)                   | 83 (10.4)                   |                     |
| <b>Smoking status</b>                |                              |                          |                         |                     |                                      |                             |                             |                     |
| Ever                                 | 2551 (28.0)                  | 741 (30.7)               | 1810 (27.1)             | 306.0,<br>p< 0.001  | 741 (30.8)                           | 545 (33.8)                  | 196 (24.6)                  | 61.2,<br>p< 0.001   |
| Never                                | 2828 (31.1)                  | 1025 (42.5)              | 1803 (27.0)             |                     | 1020 (42.4)                          | 712 (44.2)                  | 308 (38.7)                  |                     |
| Unknown                              | 3717 (40.9)                  | 645 (26.7)               | 3072(45.9)              |                     | 644 (26.8)                           | 353 (21.9)                  | 291 (36.6)                  |                     |
| <b>Grade/Gleason score</b>           |                              |                          |                         |                     |                                      |                             |                             |                     |
| Low/intermed (GS<=7)                 | 6799 (74.7)                  | 2088 (86.6)              | 4711 (70.5)             | 265.3,<br>p<0.001   | 2088 (86.6)                          | 1408 (87.4)                 | 678 (85.3)                  | 2.4,<br>p=0.305     |
| High (GS>7)                          | 1391 (15.3)                  | 243 (10.1)               | 1148 (17.2)             |                     | 243 (10.1)                           | 151 (9.4)                   | 90 (11.3)                   |                     |
| Unknown                              | 906 (10.0)                   | 80 (3.3)                 | 826 (12.4)              |                     | 80 (3.3)                             | 51 (3.2)                    | 27 (3.4)                    |                     |
| <b>Stage</b>                         |                              |                          |                         |                     |                                      |                             |                             |                     |
| I & II                               | 1617 (17.8)                  | 449 (18.6)               | 1168 (17.5)             | 43.4,<br>p<0.001    | 448 (18.6)                           | 304 (18.9)                  | 144 (18.1)                  | 1.74,<br>p=0.419    |
| III & IV                             | 1038 (11.4)                  | 187 (7.8)                | 851 (12.7)              |                     | 185 (7.7)                            | 131 (8.1)                   | 54 (6.8)                    |                     |
| Unknown                              | 6441 (70.8)                  | 1775 (73.6)              | 4666 (69.8)             |                     | 1772 (73.7)                          | 1177 (73.0)                 | 597 (75.1)                  |                     |

<sup>1</sup>6 patients were treated outside Ireland or in 'unknown' hospitals, <sup>2</sup>SAHRU 2002 index of deprivation
